# Supplementary material for: D 5h H©Cu5H5−: a covalently bonded planar pentacoordinate hydrogen star
Source: Royal Society of Chemistry journal article supplement (doi:10.1039/d4cc05041j), 2024-01-01
Supplement: d4cc05041j1.pdf [file d4cc05041j1.pdf]

## SUPPORTING INFORMATION

### **$D_{5h}$ H@Cu<sub>5</sub>H<sub>5</sub><sup>-</sup>: a covalently bonded planar pentacoordinate hydrogen star**

Li-Xia Bai,<sup>1</sup> Yan-Xia Jin,<sup>1</sup> Mesías Orozco-Ic,<sup>2</sup> Gabriel Merino,<sup>3\*</sup> and Jin-Chang Guo.<sup>1\*</sup>

<sup>1</sup>Key Laboratory of Materials for Energy Conversion and Storage of Shanxi Province, Institute of Molecular Science, Shanxi University, Taiyuan 030006 (China). E-mail: guojc@sxu.edu.cn

<sup>2</sup>Instituto de Ciencias Físicas, Universidad Nacional Autónoma de México, 62210 Cuernavaca, México.

<sup>3</sup>Departamento de Física Aplicada, Centro de Investigación y de Estudios Avanzados, Unidad Mérida. Km 6 Antigua Carretera a Progreso. Apdo. Postal 73, Cordemex, 97310, Mérida, Yuc., México  
E-mail: gmerino@cinvestav.mx

## Supporting Information

**Scheme S1.** The idea of designing **1** by stepwise replacing Li in H@Li<sub>5</sub>H<sub>5</sub><sup>-</sup> with Cu.

**Table S1.** The lowest vibrational frequency at nine classical theoretical levels for the global-minimum structure **1** ( $D_{5h}$ , <sup>1</sup>A<sub>1</sub>' ) of H@Cu<sub>5</sub>H<sub>5</sub><sup>-</sup> cluster.

**Table S2.** Composition analysis of canonical molecular orbitals (CMOs) for the GM (**1**) structure of H@Cu<sub>5</sub>H<sub>5</sub><sup>-</sup> at the PBE0/def2-TZVPP level.

**Table S3.** Energy components of IQA for the  $D_{5h}$  H@Cu<sub>5</sub>H<sub>5</sub><sup>-</sup> and Cu<sub>5</sub>H<sub>5</sub> systems at the PBE0/TZ2P level;  $V_{\text{IQA}}^{\text{int}}$ ,  $V_{\text{C}}^{\text{int}}$ , and  $V_{\text{XC}}^{\text{int}}$  are the interatomic IQA interaction energy, the coulombic and exchange-correlation energy components, respectively, in kcal mol<sup>-1</sup>.

**Table S4.** The EDA results of **1** using H and Cu<sub>5</sub>H<sub>5</sub> in different charge and electronic states as interacting fragments at the PBE0/TZ2P-ZORA level. All energy values are in kcal mol<sup>-1</sup>.

- Table S5.** The EDA–NOCV results of **1** using H and  $\text{Cu}_5\text{H}_5^-$  as interacting fragments at the PBE0/TZ2P-ZORA level. All energy values are in  $\text{kcal mol}^{-1}$ .
- Figure S1.** Optimized structures for the top 20 low-lying isomers of  $\text{Cu}_5\text{H}_6^-$  at the PBE0-D3(BJ)/def2-TZVPP level. Relative energies are listed in  $\text{kcal mol}^{-1}$  at both the single-point CCSD(T)/def2-TZVPP//PBE0-D3(BJ)/def2-TZVPP levels, with zero-point energy (ZPE) corrections at PBE0-D3(BJ)/def2-TZVPP.
- Figure S2.** Optimized structures of two low-lying isomers of  $\text{M}_5\text{H}_6^-$  ( $\text{M} = \text{Ag}, \text{Au}$ ) at the PBE0-D3(BJ)/def2-TZVPP level. Relative energies are listed in  $\text{kcal mol}^{-1}$  at the single-point CCSD(T)/def2-TZVPP//PBE0-D3(BJ)/def2-TZVPP level, with zero-point energy (ZPE) corrections at PBE0-D3(BJ)/def2-TZVPP.
- Figure S3.** The Wiberg bond indices (WBIs, blue colour) and natural atomic charges ( $|e|$ , red colour) of **1** and  $\text{H}\text{C}\text{Li}_5\text{H}_5^-$  at the PBE0-D3(BJ)/def2-TZVPP level are shown.
- Figure S4.** Calculated RMSDs of **1** during the BOMD simulations for 50 ps at PBE0/def2-SVP level, at the temperatures of 4, 300, 400 and 600 K.
- Figure S5.** (a) 2D plot of ELF of ppH  $\text{H}\text{C}\text{Cu}_5\text{H}_5^-$ . (b) Plot of the Laplacian of electron density, bond paths and critical points. The red dashed lines denote the areas of charge concentration ( $\nabla^2\rho(r) < 0$ ) and the blue area is vice versa. The brown sticks between the atoms represent bond paths. The brown and yellow dots are bond and ring critical points, respectively.
- Figure S6.** Calculated AIM charges (in  $|e|$ ) of **1** at the PBE0-D3(BJ)/def2-TZVPP level.
- Figure S7.**  $B_z^{\text{ind}}$  isolines (left panel) and GIMIC current-density maps of **1** (right panel) at the BHandHLYP/def2-TZVP level.
- Figure S8.** The canonical molecular orbital energy diagram of **1**.

Cartesian coordinates of the top 20 low-lying isomers of  $\text{Cu}_5\text{H}_6^-$  at the PBE0-D3(BJ)/def2-TZVPP level.

**Scheme S1.** The idea of designing **1** by stepwise replacing Li in  $\text{H}\text{C}\text{Li}_5\text{H}_5^-$  with Cu.

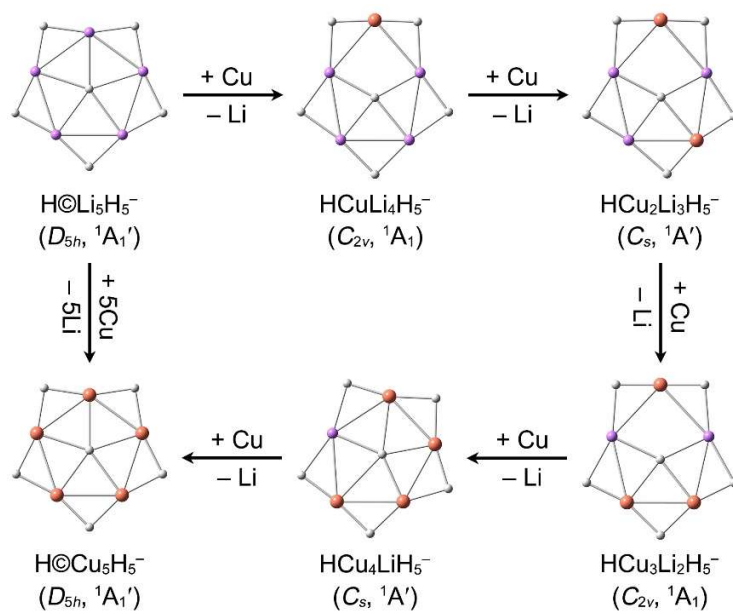

**Table S1.** The lowest vibrational frequency at nine classical theoretical levels for the global-minimum structure **1** ( $D_{5h}$ ,  $^1A_1'$ ) of  $H\text{C}\text{u}_5\text{H}_5^-$  cluster.

|   | Theoretical level          | Lowest vibrational frequency ( $\text{cm}^{-1}$ ) |
|---|----------------------------|---------------------------------------------------|
| 1 | PBE0-D3(BJ)/def2-TZVPP     | 39.3                                              |
| 2 | BP86-D3(BJ)/def2-TZVPP     | 46.7                                              |
| 3 | B3LYP-D3(BJ)/def2-TZVPP    | 45.9                                              |
| 4 | B2PLYP-D3(BJ)/def2-TZVPP   | 31.9                                              |
| 5 | B3PW91-D3(BJ)/def2-TZVPP   | 47.4                                              |
| 6 | TPSS-D3(BJ)/def2-TZVPP     | 45.2                                              |
| 7 | $\omega$ B97X-D/def2-TZVPP | 29.8                                              |
| 8 | TPSSh/def2-TZVPP           | 37.1                                              |
| 9 | CCSD/def2-TZVP             | 25.8                                              |

**Table S2.** Composition analysis of canonical molecular orbitals (CMOs) for the GM (**1**) structure of  $\text{H}\text{C}\text{Cu}_5\text{H}_5^-$  at the PBE0/def2-TZVPP level. ( $^a\text{H}$  represents the H atom at the periphery.)

| CMO                                                                                                       | H (%)        | H <sup>a</sup> (%) | Cu <sub>5</sub> (%)      |              |
|-----------------------------------------------------------------------------------------------------------|--------------|--------------------|--------------------------|--------------|
|                                                                                                           | s            | s                  | s/p/d                    | total        |
| 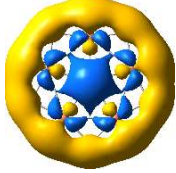<br>HOMO ( $a_1'$ )      | <b>21.44</b> | <b>22.86</b>       | 5.89/18.87/ <b>29.20</b> | <b>53.96</b> |
| <br>HOMO-1 ( $e_2'$ )   | 0.00         | 16.02              | 3.89/3.64/ <b>73.69</b>  | <b>81.22</b> |
| <br>HOMO-1' ( $e_2'$ ) | 0.00         | 16.02              | 4.21/4.73/ <b>73.77</b>  | <b>82.71</b> |
| <br>HOMO-2 ( $a_2'$ )  | 0.00         | 0.00               | 0.00/0.00/ <b>99.86</b>  | <b>99.86</b> |
| <br>HOMO-3 ( $e_1'$ )  | 0.00         | 17.51              | 19.41/2.28/ <b>58.16</b> | <b>79.85</b> |
| <br>HOMO-3' ( $e_1'$ ) | 0.00         | 17.51              | 19.41/2.69/ <b>58.66</b> | <b>80.76</b> |

| CMO                                                                                                                | H (%) | H <sup>a</sup> <sub>5</sub> (%) | Cu <sub>5</sub> (%) |       |
|--------------------------------------------------------------------------------------------------------------------|-------|---------------------------------|---------------------|-------|
|                                                                                                                    | s     | s                               | s/p/d               | total |
| 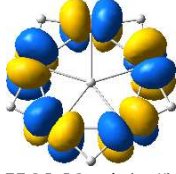<br>HOMO-4 (a <sub>1</sub> '')    | 0.00  | 0.00                            | 0.00/0.00/99.99     | 99.99 |
| <br>HOMO-5 (e <sub>2</sub> '')    | 0.00  | 0.00                            | 0.00/0.00/99.92     | 99.92 |
| <br>HOMO-5' (e <sub>2</sub> '')   | 0.00  | 0.00                            | 0.00/0.00/99.69     | 99.69 |
| <br>HOMO-6 (e <sub>1</sub> '')  | 0.00  | 0.00                            | 0.00/0.00/99.25     | 99.25 |
| <br>HOMO-6' (e <sub>1</sub> '') | 0.00  | 0.00                            | 0.00/0.00/99.25     | 99.25 |
| <br>HOMO-7 (e <sub>2</sub> ' )  | 0.00  | 0.00                            | 0.00/0.00/98.95     | 98.95 |
| <br>HOMO-7' (e <sub>2</sub> ' ) | 0.00  | 0.00                            | 0.00/0.00/98.96     | 98.96 |
| <br>HOMO-8 (e <sub>1</sub> ' )  | 0.00  | 0.00                            | 0.00/0.00/98.30     | 98.30 |

| CMO                                                                                                                 | H (%) | H <sup>a</sup> <sub>5</sub> (%) | Cu <sub>5</sub> (%) |       |
|---------------------------------------------------------------------------------------------------------------------|-------|---------------------------------|---------------------|-------|
|                                                                                                                     | s     | s                               | s/p/d               | total |
| 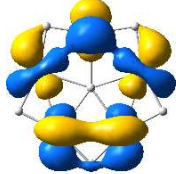<br>HOMO-8' (e <sub>1</sub> ')     | 0.00  | 0.00                            | 0.00/0.00/97.71     | 97.71 |
| <br>HOMO-9 (a <sub>1</sub> ')      | 2.59  | 0.00                            | 9.54/0.00/83.72     | 93.26 |
| <br>HOMO-10 (e <sub>1</sub> '')    | 0.00  | 0.00                            | 0.00/0.00/99.66     | 99.66 |
| <br>HOMO-10' (e <sub>1</sub> '') | 0.00  | 0.00                            | 0.00/0.00/99.65     | 99.65 |
| <br>HOMO-11 (e <sub>1</sub> ')   | 0.00  | 0.00                            | 0.00/0.00/97.82     | 97.82 |
| <br>HOMO-11' (e <sub>1</sub> ')  | 0.00  | 0.00                            | 0.00/0.00/98.46     | 98.46 |
| <br>HOMO-12 (a <sub>2</sub> '')  | 0.00  | 0.00                            | 0.00/0.00/99.25     | 99.25 |

| CMO                                                                                                                 | H (%) | H <sup>a</sup> <sub>5</sub> (%) | Cu <sub>5</sub> (%) |       |
|---------------------------------------------------------------------------------------------------------------------|-------|---------------------------------|---------------------|-------|
|                                                                                                                     | s     | s                               | s/p/d               | total |
| 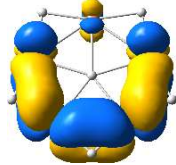<br>HOMO-13 (e <sub>2</sub> '')    | 0.00  | 0.00                            | 0.00/0.00/99.68     | 99.68 |
| <br>HOMO-13' (e <sub>2</sub> '')   | 0.00  | 0.00                            | 0.00/0.00/99.90     | 99.90 |
| <br>HOMO-14 (e <sub>2</sub> '')    | 0.00  | 16.42                           | 0.63/4.95/75.66     | 81.24 |
| <br>HOMO-14' (e <sub>2</sub> '')  | 0.00  | 16.41                           | 1.15/4.39/76.34     | 81.88 |
| <br>HOMO-15 (e <sub>2</sub> '')  | 0.00  | 43.21                           | 1.01/6.00/46.79     | 53.80 |
| <br>HOMO-15' (e <sub>2</sub> '') | 0.00  | 43.20                           | 0.56/6.67/46.77     | 54.00 |
| <br>HOMO-16 (a <sub>1</sub> '')  | 25.90 | 5.62                            | 0.00/4.17/61.82     | 65.99 |
| <br>HOMO-17 (e <sub>1</sub> '')  | 0.00  | 44.16                           | 11.53/1.82/37.20    | 50.55 |



| CMO                                                                                                              | H (%) | H <sup>a</sup> <sub>5</sub> (%) | Cu <sub>5</sub> (%)      |              |
|------------------------------------------------------------------------------------------------------------------|-------|---------------------------------|--------------------------|--------------|
|                                                                                                                  | s     | s                               | s/p/d                    | total        |
| 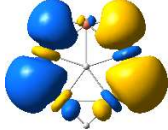<br>HOMO-17' (e <sub>1</sub> ') | 0.00  | <b>44.16</b>                    | 12.49/1.16/ <b>38.31</b> | <b>51.96</b> |
| <br>HOMO-18 (a <sub>1</sub> ')  | 16.21 | <b>32.41</b>                    | <b>24.38</b> /1.91/19.09 | <b>45.38</b> |

**Table S3.** Energy components of IQA for the  $D_{5h}$   $\text{H}\text{C}\text{u}_5\text{H}_5^-$  and  $\text{Cu}_5\text{H}_5$  systems at the PBE0/TZ2P level;  $V_{\text{IQA}}^{\text{int}}$ ,  $V_{\text{C}}^{\text{int}}$ , and  $V_{\text{XC}}^{\text{int}}$  are the interatomic IQA interaction energy, the coulombic and exchange-correlation energy components, respectively, in kcal mol<sup>-1</sup>.

|                                                    | $\text{HCu}_5\text{H}_5^-$ | $\text{Cu}_5\text{H}_5$ |
|----------------------------------------------------|----------------------------|-------------------------|
| $V_{\text{IQA}}^{\text{int}}$ (H–Cu)               | –51.23                     | —                       |
| $V_{\text{C}}^{\text{int}}$ (H–Cu)                 | –17.91 (34.96%)            | —                       |
| $V_{\text{XC}}^{\text{int}}$ (H–Cu)                | –33.32 (65.04%)            | —                       |
| $V_{\text{IQA}}^{\text{int}}$ (Cu–Cu)              | –19.51                     | –12.53                  |
| $V_{\text{C}}^{\text{int}}$ (Cu–Cu)                | 22.04 (34.66%)             | 24.97 (39.97%)          |
| $V_{\text{XC}}^{\text{int}}$ (Cu–Cu)               | –41.55 (65.34%)            | –37.50 (60.03%)         |
| $V_{\text{IQA}}^{\text{int}}$ (H <sup>a</sup> –Cu) | –101.78                    | –108.49                 |
| $V_{\text{C}}^{\text{int}}$ (H <sup>a</sup> –Cu)   | –24.05 (23.63%)            | –26.05 (24.01%)         |
| $V_{\text{XC}}^{\text{int}}$ (H <sup>a</sup> –Cu)  | –77.73 (76.37%)            | –82.44 (75.99%)         |

<sup>a</sup>The H atom at the periphery.

**Table S4.** The EDA results of **1** using H and Cu<sub>5</sub>H<sub>5</sub> in different charge and electronic states as interacting fragments at the PBE0/TZ2P-ZORA level. All energy values are in kcal mol<sup>-1</sup>.

| Energy                     | H (D, 1s <sup>1</sup> ) + Cu <sub>5</sub> H <sub>5</sub> <sup>-</sup> | H <sup>-</sup> (S, 1s <sup>2</sup> ) | H <sup>+</sup> (S, 1s <sup>0</sup> )               |
|----------------------------|-----------------------------------------------------------------------|--------------------------------------|----------------------------------------------------|
| Term                       | (D)                                                                   | + Cu <sub>5</sub> H <sub>5</sub> (S) | + Cu <sub>5</sub> H <sub>5</sub> <sup>2-</sup> (S) |
| $\Delta E_{\text{int}}$    | -72.78                                                                | -85.32                               | -466.01                                            |
| $\Delta E_{\text{Pauli}}$  | 96.01                                                                 | 370.47                               | 0.02                                               |
| $\Delta E_{\text{elstat}}$ | -81.63 (48.36%)                                                       | -312.73 (68.61%)                     | -252.39 (54.16%)                                   |
| $\Delta E_{\text{orb}}$    | <b>-87.16</b> (51.64%)                                                | -143.06 (31.39%)                     | -213.64 (45.84%)                                   |

**Table S5.** The EDA–NOCV results of **1** using H and Cu<sub>5</sub>H<sub>5</sub><sup>−</sup> as interacting fragments at the PBE0/TZ2P-ZORA level. All energy values are in kcal mol<sup>−1</sup>.

| Energy Term                            | Interaction                                                      | H (D, 1s <sup>1</sup> ) + Cu <sub>5</sub> H <sub>5</sub> <sup>−</sup> (D) |
|----------------------------------------|------------------------------------------------------------------|---------------------------------------------------------------------------|
| $\Delta E_{\text{int}}$                |                                                                  | −72.78                                                                    |
| $\Delta E_{\text{Pauli}}$              |                                                                  | 96.01                                                                     |
| $\Delta E_{\text{elstat}}^a$           |                                                                  | −81.63 (48.36%)                                                           |
| $\Delta E_{\text{orb}}^a$              |                                                                  | −87.16 (51.64%)                                                           |
| $\Delta E_{\text{orb}(1)}^b$           | Cu <sub>5</sub> H <sub>5</sub> <sup>−</sup> →H $\sigma$ donation | −79.65 (91.38%)                                                           |
| $\Delta E_{\text{orb}(\text{rest})}^b$ |                                                                  | −7.51 (8.62%)                                                             |

*a.* The percentage contribution with respect to the total attraction is given in parentheses; *b.* the percentage contribution with respect to the total orbital interaction is given in parentheses.

**Figure S1.** Optimized structures for the top 20 low-lying isomers of  $\text{Cu}_5\text{H}_6^-$  at the PBE0-D3(BJ)/def2-TZVPP level. Relative energies are listed in  $\text{kcal mol}^{-1}$  at both the single-point CCSD(T)/def2-TZVPP//PBE0-D3(BJ)/def2-TZVPP levels, with zero-point energy (ZPE) corrections at PBE0-D3(BJ)/def2-TZVPP. (The most stable triplet structure is higher  $61.03 \text{ kcal mol}^{-1}$  in energy than **1**, so it is not listed.)

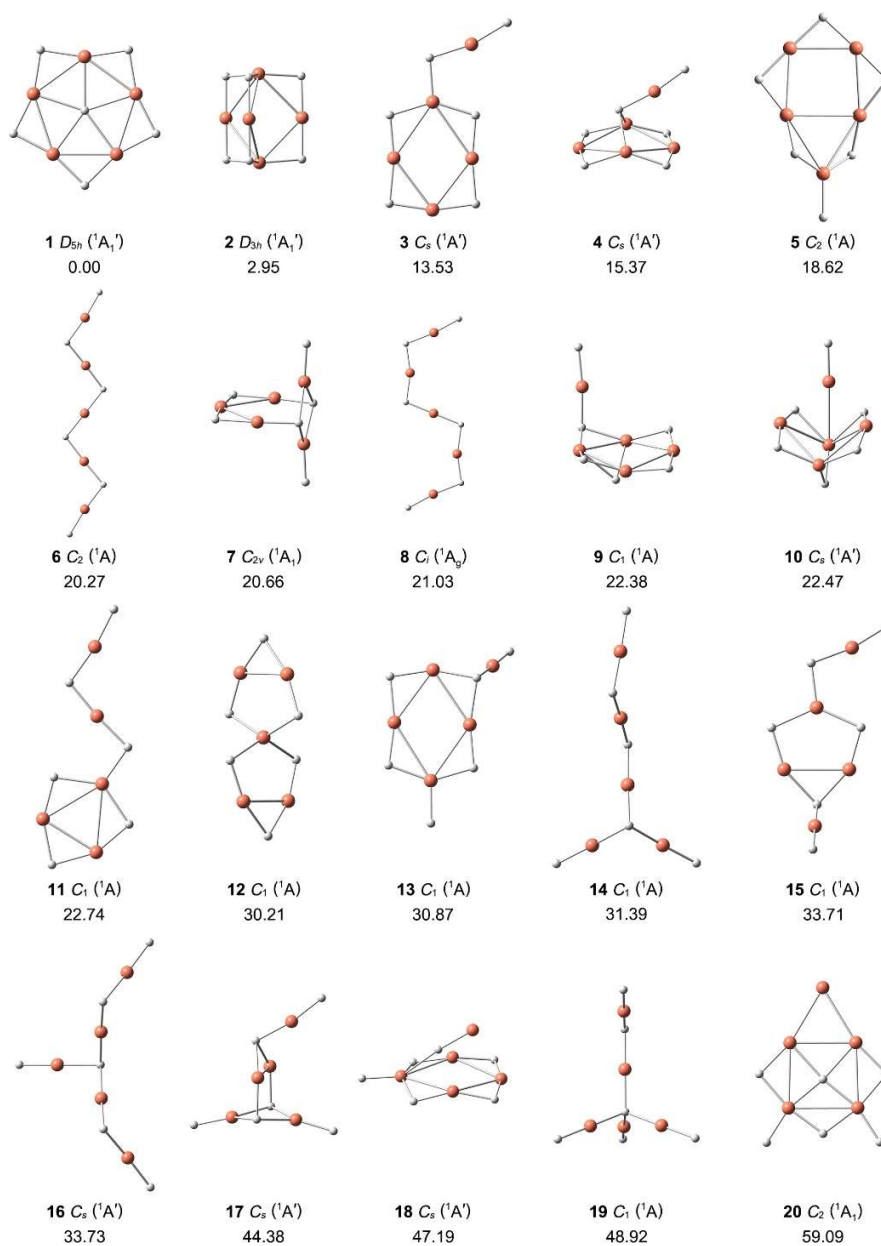

**Figure S2.** Optimized structures of two low-lying isomers of  $M_5H_6^-$  ( $M = Ag, Au$ ) at the PBE0-D3(BJ)/def2-TZVPP level. Relative energies are listed in  $\text{kcal mol}^{-1}$  at the single-point CCSD(T)/def2-TZVPP//PBE0-D3(BJ)/def2-TZVPP level, with zero-point energy (ZPE) corrections at PBE0-D3(BJ)/def2-TZVPP.

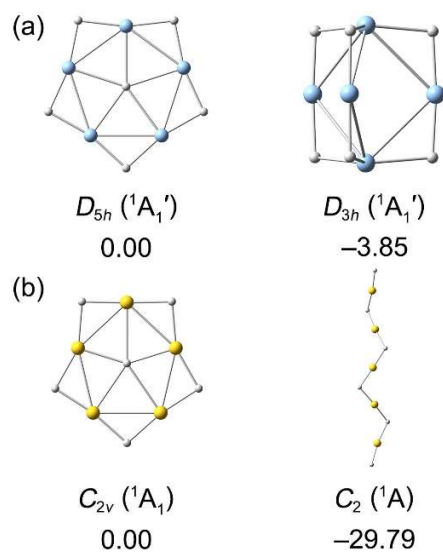

**Figure S3.** The Wiberg bond indices (WBIs, blue colour) and natural atomic charges ( $|e|$ , red colour) of **1** and  $\text{H}\text{C}\text{Li}_5\text{H}_5^-$  at the PBE0-D3(BJ)/def2-TZVPP level are shown.

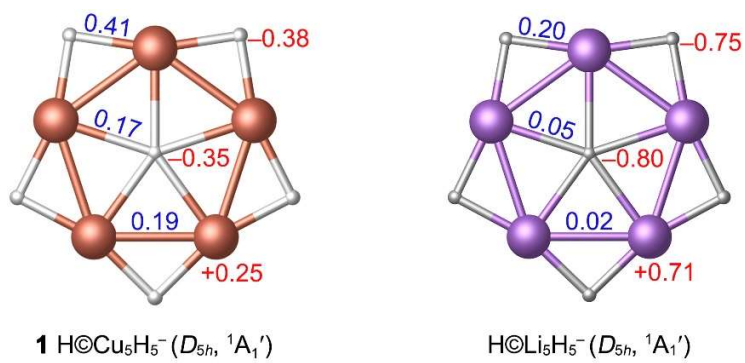

**Figure S4.** Calculated RMSDs of **1** during the BOMD simulations for 50 ps at PBE0/def2-SVP level, at the temperatures of 4, 300, 400 and 600 K.

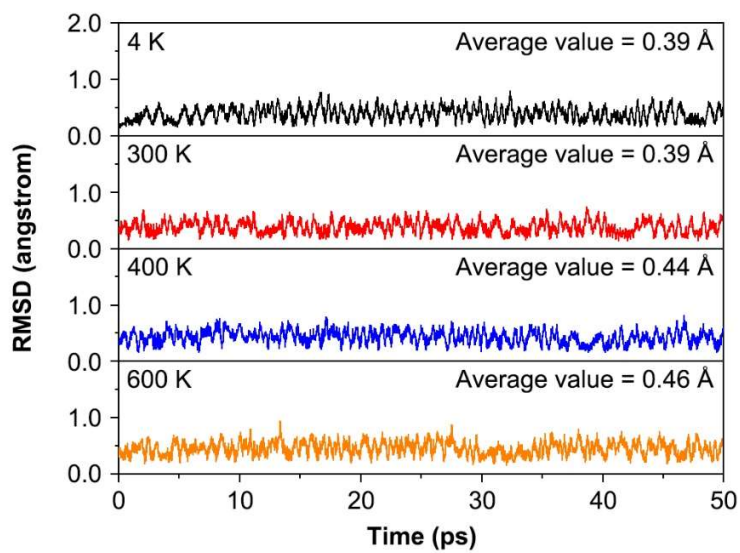



**Figure S5.** (a) 2D plot of ELF of ppH  $\text{H}\text{C}\text{u}_5\text{H}_5^-$ . (b) Plot of the Laplacian of electron density, bond paths and critical points. The red dashed lines denote the areas of charge concentration ( $\nabla^2\rho(\mathbf{r}) < 0$ ) and the blue area is vice versa. The brown sticks between the atoms represent bond paths. The brown and yellow dots are bond and ring critical points, respectively.

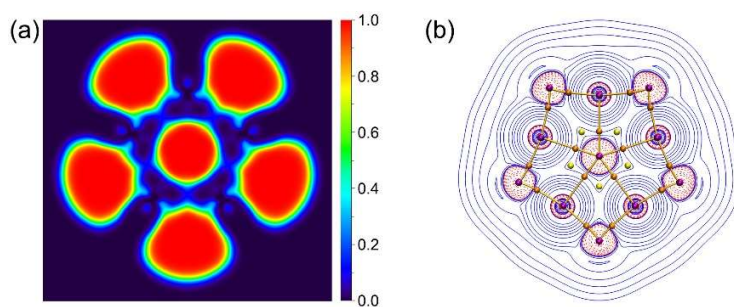

**Figure S6.** Calculated AIM charges (in |e|) of **1** at the PBE0-D3(BJ)/def2-TZVPP level.

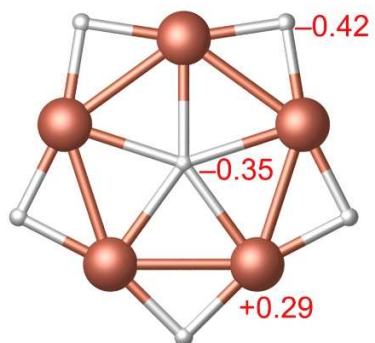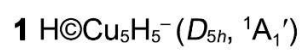

**Figure S7.**  $B_z^{\text{ind}}$  isolines (left panel) and GIMIC current-density maps of **1** (right panel) at the BHandHLYP/def2-TZVP level.

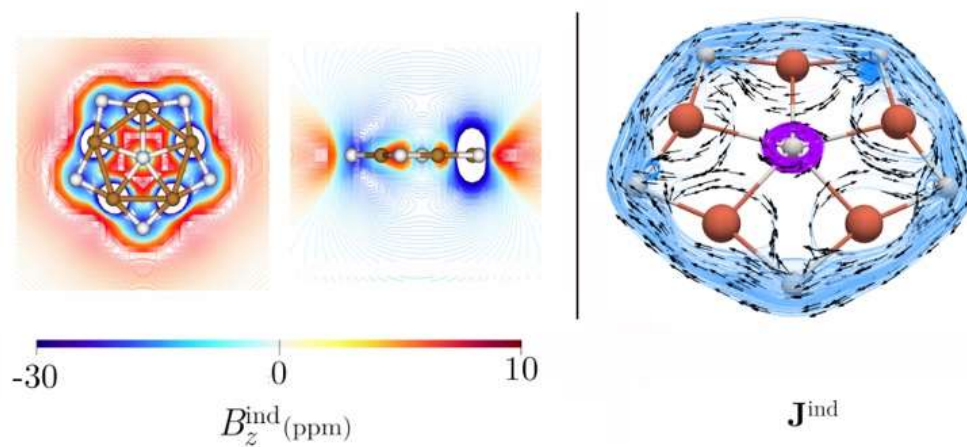

**Figure S8.** The canonical molecular orbital energy diagram of **1**.

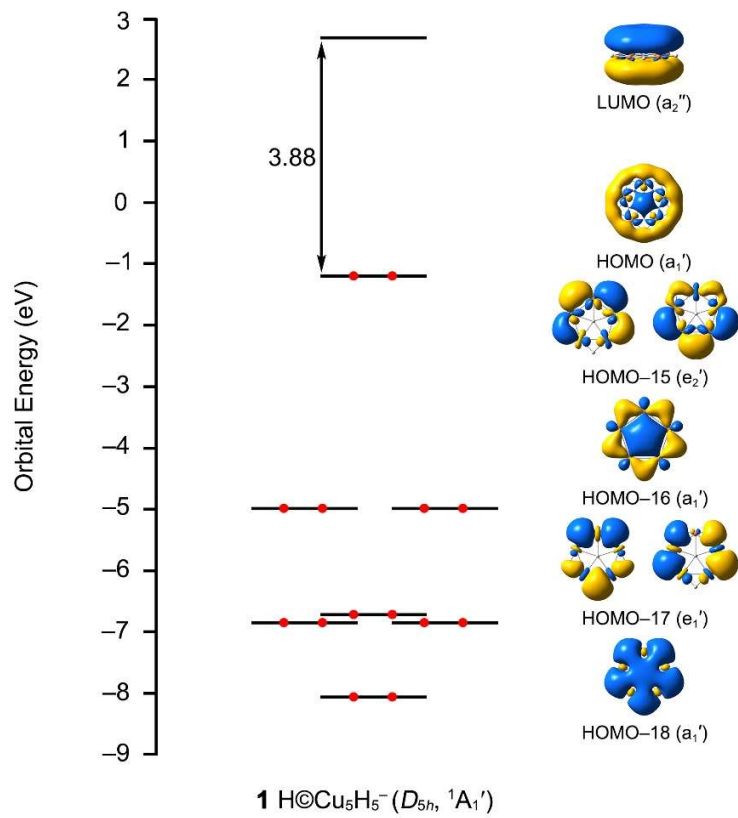

Cartesian coordinates of the top 20 low-lying isomers of  $\text{Cu}_5\text{H}_6^-$  at the PBE0-D3(BJ)/def2-TZVPP level.

**1**  $\text{HCu}_5\text{H}_5^-$  ( $D_{5h}$ ,  $^1A_1'$ )

|    |             |             |            |
|----|-------------|-------------|------------|
| Cu | 0.00000000  | 2.00998100  | 0.00000000 |
| Cu | -1.91160600 | 0.62111800  | 0.00000000 |
| Cu | -1.18143700 | -1.62610900 | 0.00000000 |
| Cu | 1.18143700  | -1.62610900 | 0.00000000 |
| Cu | 1.91160600  | 0.62111800  | 0.00000000 |
| H  | 0.00000000  | 0.00000000  | 0.00000000 |
| H  | 2.65840500  | -0.86376800 | 0.00000000 |
| H  | 1.64298500  | 2.26137400  | 0.00000000 |
| H  | -1.64298500 | 2.26137400  | 0.00000000 |
| H  | -2.65840500 | -0.86376800 | 0.00000000 |
| H  | 0.00000000  | -2.79521200 | 0.00000000 |

**2** ( $D_{3h}$ ,  $^1A_1'$ )

|    |             |             |             |
|----|-------------|-------------|-------------|
| Cu | 0.00000000  | 1.74550081  | 0.00000000  |
| Cu | 1.51164804  | -0.87275040 | 0.00000000  |
| Cu | 0.00000000  | 0.00000000  | 1.71584600  |
| Cu | -0.00000000 | 0.00000000  | -1.71584600 |
| Cu | -1.51164804 | -0.87275040 | 0.00000000  |
| H  | 0.00000000  | 1.72391181  | -1.60942100 |
| H  | 1.49295142  | -0.86195590 | -1.60942100 |
| H  | -1.49295142 | -0.86195590 | 1.60942100  |
| H  | -1.49295142 | -0.86195590 | -1.60942100 |
| H  | 0.00000000  | 1.72391181  | 1.60942100  |
| H  | 1.49295142  | -0.86195590 | 1.60942100  |

**3** ( $C_s$ ,  $^1A'$ )

|    |             |             |            |
|----|-------------|-------------|------------|
| Cu | 0.20250272  | 3.49274928  | 0.00000000 |
| Cu | 1.35632941  | -0.56070669 | 0.00000000 |
| Cu | -1.42812988 | -1.32289205 | 0.00000000 |
| Cu | -0.59734494 | 1.05931998  | 0.00000000 |
| Cu | 0.46706904  | -2.78096836 | 0.00000000 |
| H  | 1.26453312  | 4.61996506  | 0.00000000 |
| H  | 1.94472810  | -2.14622375 | 0.00000000 |
| H  | -1.15200105 | 2.59981790  | 0.00000000 |
| H  | -1.12976357 | -2.98324377 | 0.00000000 |

|   |             |            |            |
|---|-------------|------------|------------|
| H | 1.05403922  | 1.00619715 | 0.00000000 |
| H | -1.99390019 | 0.16592479 | 0.00000000 |

#### 4 (C<sub>s</sub>, <sup>1</sup>A')

|    |             |             |             |
|----|-------------|-------------|-------------|
| Cu | 0.23149746  | 2.19958109  | 0.00000000  |
| Cu | -1.27611267 | -1.25010256 | 0.00000000  |
| Cu | -0.11921435 | 0.31127134  | 1.40476700  |
| Cu | 1.26653644  | -1.54245613 | 0.00000000  |
| Cu | -0.11921435 | 0.31127134  | -1.40476700 |
| H  | -1.22883419 | -0.95983739 | 1.60625300  |
| H  | 1.65224260  | -3.03730704 | 0.00000000  |
| H  | 1.11032424  | 0.07768407  | 0.00000000  |
| H  | 0.08690901  | 2.01095550  | -1.61185400 |
| H  | -1.22883419 | -0.95983739 | -1.60625300 |
| H  | 0.08690901  | 2.01095550  | 1.61185400  |

#### 5 (C<sub>2</sub>, <sup>1</sup>A)

|    |             |             |             |
|----|-------------|-------------|-------------|
| Cu | -0.17266102 | -1.36499824 | 0.52165013  |
| Cu | 0.20893690  | -1.17200171 | -1.88978287 |
| Cu | -0.20893690 | 1.17200171  | -1.88978287 |
| Cu | 0.17266102  | 1.36499824  | 0.52165013  |
| Cu | 0.00000000  | 0.00000000  | 2.61519813  |
| H  | -0.36569243 | 2.27931958  | -0.76908487 |
| H  | 0.92002026  | 1.19574550  | 1.93094613  |
| H  | -0.92002026 | -1.19574550 | 1.93094613  |
| H  | 0.36569243  | -2.27931958 | -0.76908487 |
| H  | 0.00000000  | 0.00000000  | -3.00679987 |
| H  | 0.00000000  | 0.00000000  | 4.19403113  |

#### 6 (C<sub>2</sub>, <sup>1</sup>A)

|    |             |             |             |
|----|-------------|-------------|-------------|
| Cu | -0.02331234 | 2.51215384  | -0.02234524 |
| Cu | 0.02750244  | 5.02528557  | -0.02647124 |
| Cu | 0.02331234  | -2.51215384 | -0.02234524 |
| Cu | -0.02750244 | -5.02528557 | -0.02647124 |
| Cu | 0.00000000  | 0.00000000  | 0.09530776  |
| H  | 0.74709914  | -6.34327946 | 0.09861776  |
| H  | -0.98210549 | -3.72822689 | -0.18126724 |
| H  | 0.98568577  | -1.25000522 | 0.11636476  |
| H  | -0.98568577 | 1.25000522  | 0.11636476  |
| H  | 0.98210549  | 3.72822689  | -0.18126724 |
| H  | -0.74709914 | 6.34327946  | 0.09861776  |

**7 ( $C_{2v}$ ,  $^1A_1$ )**

|    |             |             |             |
|----|-------------|-------------|-------------|
| Cu | 0.00000000  | 1.57795200  | 0.25739785  |
| Cu | 0.00000000  | 0.00000000  | 2.04667785  |
| Cu | 0.00000000  | -1.57795200 | 0.25739785  |
| Cu | -1.26618800 | 0.00000000  | -1.25456615 |
| Cu | 1.26618800  | 0.00000000  | -1.25456615 |
| H  | 2.81608700  | -0.00000000 | -1.33628615 |
| H  | 0.00000000  | -1.62092800 | 1.90836285  |
| H  | -2.81608700 | -0.00000000 | -1.33628615 |
| H  | -0.00000000 | 1.62092800  | 1.90836285  |
| H  | 0.00000000  | -1.31650200 | -1.33102515 |
| H  | -0.00000000 | 1.31650200  | -1.33102515 |

**8 ( $C_i$ ,  $^1A_g$ )**

|    |             |             |             |
|----|-------------|-------------|-------------|
| Cu | -4.32224395 | -0.50380939 | 0.00151989  |
| Cu | -2.30919009 | 1.00653679  | -0.00202234 |
| Cu | 0.00000000  | 0.00000000  | 0.00000000  |
| Cu | 2.30919009  | -1.00653679 | 0.00202234  |
| Cu | 4.32224395  | 0.50380939  | -0.00151989 |
| H  | 0.76567512  | -1.39182791 | 0.07619934  |
| H  | -3.89298310 | 1.05437666  | 0.07306757  |
| H  | -0.76567512 | 1.39182791  | -0.07619934 |
| H  | -4.90268782 | -1.92233146 | -0.05735384 |
| H  | 3.89298310  | -1.05437666 | -0.07306757 |
| H  | 4.90268782  | 1.92233146  | 0.05735384  |

**9 ( $C_i$ ,  $^1A$ )**

|    |             |             |             |
|----|-------------|-------------|-------------|
| Cu | -0.18472900 | -0.94640800 | 0.82058900  |
| Cu | 1.51307500  | 1.19799100  | -0.31035800 |
| Cu | 1.87249600  | -1.15197300 | -0.32369700 |
| Cu | -0.69966300 | 1.30829800  | 0.40976900  |
| Cu | -2.47573200 | -0.40330500 | -0.56863100 |
| H  | -3.43041000 | -0.83318000 | -1.70813700 |
| H  | 0.22567500  | 2.30960800  | -0.53327700 |
| H  | 2.70318700  | 0.14748800  | -0.87942800 |
| H  | -1.70818800 | 0.00187200  | 0.81806400  |
| H  | 0.74620700  | 0.46166300  | 1.32763700  |
| H  | 0.72556800  | -2.22094600 | 0.17264700  |

**10 ( $C_s$ ,  $^1A'$ )**

|    |             |             |             |
|----|-------------|-------------|-------------|
| Cu | -0.07918374 | -0.39720307 | 1.66803300  |
| Cu | 1.89599528  | -0.29580724 | 0.00000000  |
| Cu | -1.81441833 | -0.26618501 | 0.00000000  |
| Cu | -0.07918374 | -0.39720307 | -1.66803300 |
| Cu | 0.05885165  | 1.38151393  | 0.00000000  |
| H  | -1.55298248 | -1.06131014 | -1.54396600 |
| H  | -1.55298248 | -1.06131014 | 1.54396600  |
| H  | 1.14875816  | 0.66225940  | 1.33947300  |
| H  | 1.14875816  | 0.66225940  | -1.33947300 |
| H  | -1.57718875 | 1.54899050  | 0.00000000  |
| H  | 2.90586484  | -1.47923965 | 0.00000000  |

**11** ( $C_1$ ,  $^1A$ )

|    |             |             |            |
|----|-------------|-------------|------------|
| Cu | -0.69605299 | -0.64472603 | 0.00000000 |
| Cu | 4.27374700  | 0.17017307  | 0.00000000 |
| Cu | -3.20948499 | -0.69705908 | 0.00000000 |
| Cu | -2.21630803 | 1.37921494  | 0.00000000 |
| Cu | 1.75259400  | -0.18601198 | 0.00000000 |
| H  | 5.71461901  | -0.37438690 | 0.00000000 |
| H  | -3.84466002 | 0.87181991  | 0.00000000 |
| H  | -0.64539102 | 1.14428297  | 0.00000000 |
| H  | -2.05790896 | -1.78706706 | 0.00000000 |
| H  | 0.74070303  | -1.43509600 | 0.00000000 |
| H  | 2.86228298  | 0.95431005  | 0.00000000 |

**12** ( $C_1$ ,  $^1A$ )

|    |             |             |             |
|----|-------------|-------------|-------------|
| Cu | -0.00102100 | -0.06028900 | 0.00322400  |
| Cu | -2.26971500 | -0.08622800 | 1.14583400  |
| Cu | -2.26055600 | 0.09653200  | -1.15176900 |
| Cu | 2.22559400  | 1.17483400  | 0.09271800  |
| Cu | 2.30578100  | -1.12207800 | -0.09011200 |
| H  | -0.81043400 | -0.22706100 | 1.68979800  |
| H  | 0.86004800  | -1.72089200 | -0.12741100 |
| H  | 3.50696000  | 0.06991300  | -0.00666200 |
| H  | 0.74289000  | 1.66936700  | 0.14461000  |
| H  | -0.79599300 | 0.04269400  | -1.69706900 |
| H  | -3.50588200 | 0.08562600  | -0.00023700 |

**13** ( $C_1$ ,  $^1A$ )

|    |             |             |             |
|----|-------------|-------------|-------------|
| Cu | -1.07224800 | 1.23803100  | -0.29129500 |
| Cu | 2.39177300  | -0.89360400 | 0.10851700  |



|    |             |             |             |
|----|-------------|-------------|-------------|
| Cu | 1.26784700  | 1.37432600  | 0.22505600  |
| Cu | -0.07460900 | -0.98073100 | -0.38960600 |
| Cu | -2.59236600 | -0.67283500 | 0.31649800  |
| H  | -3.65540800 | -1.08614200 | 1.33669300  |
| H  | -1.58376700 | -0.21999100 | -0.89846900 |
| H  | -0.06857500 | 2.41819400  | 0.09267400  |
| H  | 2.70840200  | 0.69998600  | 0.41099700  |
| H  | 3.71971700  | -1.74065600 | 0.19931500  |
| H  | 1.18814900  | -1.96181300 | -0.24713300 |

**14** ( $C_i$ ,  $^1A$ )

|    |             |             |             |
|----|-------------|-------------|-------------|
| Cu | -4.35376600 | 0.02664800  | 0.14444400  |
| Cu | -1.85725700 | -0.05303600 | -0.10273900 |
| Cu | 0.63879500  | 0.09518100  | -0.23360800 |
| Cu | 2.71910400  | -1.31364200 | 0.08951700  |
| Cu | 2.86539100  | 1.24212100  | 0.12160500  |
| H  | 1.94716400  | 0.00334500  | 0.76244100  |
| H  | -3.00559500 | -0.38125600 | 0.94140700  |
| H  | -5.71170800 | 0.36561300  | -0.48292900 |
| H  | 3.40079000  | -2.60450000 | -0.35606900 |
| H  | -0.66653000 | 0.23304800  | -1.12708700 |
| H  | 3.68013300  | 2.46284700  | -0.29511900 |

**15** ( $C_i$ ,  $^1A$ )

|    |             |             |             |
|----|-------------|-------------|-------------|
| Cu | -0.69306800 | -1.06608300 | -0.33670000 |
| Cu | -1.15313400 | 1.22676700  | -0.26510200 |
| Cu | 3.64890800  | -0.28048800 | 0.08559600  |
| Cu | -3.10442700 | -0.36649500 | 0.30495300  |
| Cu | 1.22338900  | 0.49715100  | 0.18156500  |
| H  | 2.73757000  | 0.99522600  | 0.49025700  |
| H  | 4.74384600  | -1.31385700 | -0.26180900 |
| H  | 0.83615600  | -1.20727300 | 0.03544400  |
| H  | 0.19044800  | 1.94270300  | 0.14245000  |
| H  | -2.06583200 | -0.12272900 | -0.92086000 |
| H  | -4.17056200 | -0.60878900 | 1.37548300  |

**16** ( $C_s$ ,  $^1A'$ )

|    |             |             |             |
|----|-------------|-------------|-------------|
| Cu | -0.12476279 | 2.14824825  | 0.00000000  |
| Cu | 0.16837306  | -0.02657793 | 1.26563500  |
| Cu | -0.09743284 | -1.04639101 | 3.52635000  |
| Cu | -0.09743284 | -1.04639101 | -3.52635000 |

|    |             |             |             |
|----|-------------|-------------|-------------|
| Cu | 0.16837306  | -0.02657793 | -1.26563500 |
| H  | 0.24755737  | 3.62669593  | 0.00000000  |
| H  | -1.04889248 | -1.44843992 | 4.65889500  |
| H  | 1.03017149  | -0.68532236 | -2.41893100 |
| H  | -1.04889248 | -1.44843992 | -4.65889500 |
| H  | 1.03017149  | -0.68532236 | 2.41893100  |
| H  | -0.70652684 | 0.57382787  | 0.00000000  |

**17** ( $C_s$ ,  $^1A'$ )

|    |             |             |             |
|----|-------------|-------------|-------------|
| Cu | 0.35508600  | 0.18887400  | -1.19035000 |
| Cu | 0.35508600  | 2.49824800  | 0.00000000  |
| Cu | -1.62020500 | -0.82912500 | 0.00000000  |
| Cu | 0.35508600  | 0.18887400  | 1.19035000  |
| Cu | 0.59633300  | -2.01439400 | 0.00000000  |
| H  | 1.21504000  | 1.11605700  | 0.00000000  |
| H  | -0.22968100 | 3.91760200  | 0.00000000  |
| H  | 1.74576300  | -3.04870900 | 0.00000000  |
| H  | -0.40498500 | -1.23054600 | 1.36790600  |
| H  | -3.12132900 | -0.46566000 | 0.00000000  |
| H  | -0.40498500 | -1.23054600 | -1.36790600 |

**18** ( $C_s$ ,  $^1A'$ )

|    |             |             |             |
|----|-------------|-------------|-------------|
| Cu | -0.90284512 | -1.69227121 | 0.00000000  |
| Cu | 1.53715563  | -1.02314351 | 0.00000000  |
| Cu | 0.02491574  | 2.20809552  | 0.00000000  |
| Cu | -0.30757030 | 0.16776424  | 1.37787300  |
| Cu | -0.30757030 | 0.16776424  | -1.37787300 |
| H  | -0.33530310 | 1.78131565  | -1.58051400 |
| H  | 0.23870011  | 3.76298163  | 0.00000000  |
| H  | -0.88619125 | -1.42514197 | -1.59898200 |
| H  | -0.88619125 | -1.42514197 | 1.59898200  |
| H  | 0.92580466  | 0.50660182  | 0.00000000  |
| H  | -0.33530310 | 1.78131565  | 1.58051400  |

**19** ( $C_i$ ,  $^1A'$ )

|    |             |             |             |
|----|-------------|-------------|-------------|
| Cu | -1.76387900 | 0.06149700  | -1.31395600 |
| Cu | -1.11628800 | -1.38812700 | 0.85840100  |
| Cu | -1.07803100 | 1.33197000  | 0.95305900  |
| Cu | 0.74986800  | -0.00499200 | -0.48918400 |
| Cu | 3.19845700  | -0.00068300 | -0.02857800 |
| H  | 2.13476300  | -0.00795100 | -1.24969600 |

|   |             |             |             |
|---|-------------|-------------|-------------|
| H | -2.61500200 | 0.11925500  | -2.57518000 |
| H | -1.35362000 | 2.57679200  | 1.78484200  |
| H | -1.42341100 | -2.68091000 | 1.60140200  |
| H | -0.79701400 | -0.00230200 | 0.03201900  |
| H | 4.34057900  | 0.00482000  | 0.99411100  |

**20** ( $C_2, {}^1A_1$ )

|    |            |             |             |
|----|------------|-------------|-------------|
| Cu | 0.00000000 | 0.00000000  | 2.71918023  |
| Cu | 0.00000000 | 1.30355200  | -1.81685177 |
| Cu | 0.00000000 | 1.23919200  | 0.64373523  |
| Cu | 0.00000000 | -1.23919200 | 0.64373523  |
| Cu | 0.00000000 | -1.30355200 | -1.81685177 |
| H  | 0.00000000 | 2.39651900  | -0.53021777 |
| H  | 0.00000000 | -2.39651900 | -0.53021777 |
| H  | 0.00000000 | 0.00000000  | -2.78490877 |
| H  | 0.00000000 | 2.12896100  | -3.11567877 |
| H  | 0.00000000 | 0.00000000  | -0.73876577 |
| H  | 0.00000000 | -2.12896100 | -3.11567877 |
